# Supplementary material for: Protocol of digital decision support system (DDSS) embedded within a tele-primary healthcare platform in Pakistan: an assessment of usability, acceptability, effectiveness and perceived quality of care in a resource-constrained setting
Source: HighWire-hosted journal article supplement (doi:10.1136/bmjopen-2023-082167), 2024-09-01
Supplement: bmjopen-2023-082167supp006_data_supplement.pdf [file bmjopen-2023-082167supp006_data_supplement.pdf]

## TECHNICAL FEASIBILITY AND USABILITY ASSESSMENT CHECKLIST FOR DIGITAL DECISION SUPPORT SYSTEM

| <b>TECHNICAL FEASIBILITY AND USABILITY ASSESSMENT CHECKLIST</b>                                                                            |     |    |
|--------------------------------------------------------------------------------------------------------------------------------------------|-----|----|
| <b>Checklist</b>                                                                                                                           | Yes | No |
| <b>Data Quality and Availability</b>                                                                                                       |     |    |
| SOPs of data management and analysis                                                                                                       |     |    |
| Checks and fail safe procedure in data                                                                                                     |     |    |
| Use of electronic medical records                                                                                                          |     |    |
| Use of clinical guidelines                                                                                                                 |     |    |
| <b>Integration with Existing Systems</b>                                                                                                   |     |    |
| Electronic Health Record (EHR) integration                                                                                                 |     |    |
| Hospital Information System (HIS) compatibility                                                                                            |     |    |
| <b>Accuracy and Reliability</b>                                                                                                            |     |    |
| Has there been an algorithm performance evaluation conducted                                                                               |     |    |
| Has any validation study conducted on algorithm                                                                                            |     |    |
| <b>Scalability</b>                                                                                                                         |     |    |
| Has there been Infrastructure capacity planning for scalability                                                                            |     |    |
| Have you followed a Modular architecture design in algorithm deployment                                                                    |     |    |
| <b>Privacy and Security</b>                                                                                                                |     |    |
| Do you use any data encryption methods                                                                                                     |     |    |
| Are there any access control mechanisms                                                                                                    |     |    |
| <b>Regulatory Compliance</b>                                                                                                               |     |    |
| Do you use HIPAA compliance (US)                                                                                                           |     |    |
| Do you use GDPR compliance (EU)                                                                                                            |     |    |
| <b>Cost-effectiveness</b>                                                                                                                  |     |    |
| Have you budgeted for DDSS Implementation costs                                                                                            |     |    |
| Have you budgeted for DDSS Maintenance costs                                                                                               |     |    |
| <b>Accuracy and completeness of disease protocol</b>                                                                                       |     |    |
| Does the protocol align with established international clinical guidelines?                                                                |     |    |
| Does the protocol cover all relevant aspects of the disease, including<br>1. Diagnostic plan<br>2. Treatment plan<br>3. Disease management |     |    |
| Does the protocol include information on risk factors for the disease?                                                                     |     |    |
| Does the protocol offer guidance on the management of symptoms and potential complications associated with the disease?                    |     |    |
| Does the protocol consider the specific needs of different patient populations, such as children, pregnant women, or older adults?         |     |    |
| Does the protocol cover appropriate follow-up care and monitoring for patients with the disease?                                           |     |    |

|                                                                                                                                                               |  |  |
|---------------------------------------------------------------------------------------------------------------------------------------------------------------|--|--|
| Does the protocol include information on patient education, self-care, and lifestyle modifications related to the disease?                                    |  |  |
| Does the protocol provide recommendations for healthcare providers on reporting or notifying cases of the disease to public health authorities, if necessary? |  |  |
| Does the protocol address any relevant legal or ethical considerations associated with the disease or its treatment?                                          |  |  |
| Does the protocol reference additional resources or references for further information on the disease?                                                        |  |  |
